# Supplementary material
Source: HighWire-hosted journal article supplement (https://heart.bmj.com/content/107/3/201)
Supplement: inline-supplementary-material-2 [file inline-supplementary-material-2.pdf]

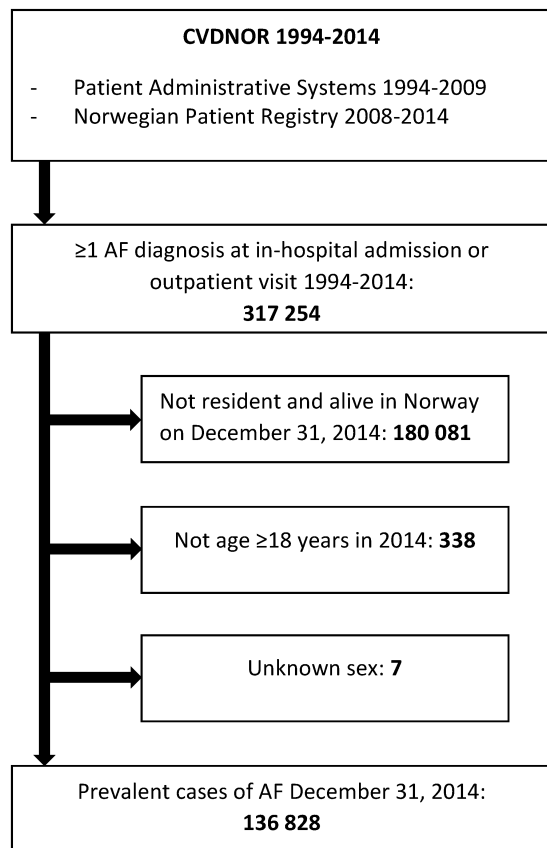

**Supplementary Figure 2.** Selection of prevalent cases of atrial fibrillation (AF) at the end of 2014 in Norway based on data from the Cardiovascular Disease in Norway 1994-2014 (CVDNOR) project.
