# Supplementary material
Source: HighWire-hosted journal article supplement (https://heart.bmj.com/content/107/3/201)
Supplement: inline-supplementary-material-5 [file inline-supplementary-material-5.pdf]

Kjerpeseth LJ, Igland J, Selmer R, et al. *Heart* 2020**Supplementary Table 3.** Mean age and age-standardized incidence rates of atrial fibrillation (AF) per 100 000 person years in adults ( $\geq 18$  years) from 2004 to 2014 in Norway by type of AF diagnosis, year and sex.

|              | AF primary diagnosis <sup>1</sup> |                        |                          | AF secondary diagnosis <sup>2</sup> |                        |                          | All AF diagnoses <sup>3</sup> |                        |                          | AF-free population, personyears |
|--------------|-----------------------------------|------------------------|--------------------------|-------------------------------------|------------------------|--------------------------|-------------------------------|------------------------|--------------------------|---------------------------------|
|              | Age, mean (SD)                    | Cases (%) <sup>4</sup> | IR (95% CI) <sup>5</sup> | Age, mean (SD)                      | Cases (%) <sup>4</sup> | IR (95% CI) <sup>5</sup> | Age, mean (SD)                | Cases (%) <sup>4</sup> | IR (95% CI) <sup>5</sup> |                                 |
| <b>Men</b>   |                                   |                        |                          |                                     |                        |                          |                               |                        |                          |                                 |
| <b>2004</b>  | 65.6 (13.7)                       | 2297 (0.14)            | 152 (146-158)            | 75.3 (11.0)                         | 5557 (0.33)            | 421 (410-432)            | 72.5 (12.7)                   | 7887 (0.47)            | 576 (564-589)            | 1 676 432                       |
| <b>2005</b>  | 65.7 (14.0)                       | 2477 (0.15)            | 163 (156-169)            | 75.5 (11.1)                         | 6008 (0.36)            | 455 (443-466)            | 72.7 (12.8)                   | 8508 (0.50)            | 620 (606-633)            | 1 685 944                       |
| <b>2006</b>  | 65.7 (13.9)                       | 2573 (0.15)            | 167 (161-174)            | 75.2 (11.3)                         | 6073 (0.36)            | 454 (442-465)            | 72.4 (12.9)                   | 8682 (0.51)            | 624 (611-637)            | 1 698 451                       |
| <b>2007</b>  | 65.3 (14.0)                       | 2560 (0.15)            | 163 (157-170)            | 75.0 (11.3)                         | 6083 (0.35)            | 448 (436-459)            | 72.2 (13.0)                   | 8681 (0.51)            | 614 (601-627)            | 1 717 627                       |
| <b>2008</b>  | 65.5 (14.2)                       | 2647 (0.15)            | 167 (160-173)            | 74.9 (11.8)                         | 6044 (0.35)            | 442 (431-453)            | 72.0 (13.3)                   | 8721 (0.50)            | 612 (599-625)            | 1 749 325                       |
| <b>2009</b>  | 66.0 (13.7)                       | 2741 (0.15)            | 171 (164-177)            | 75.0 (11.7)                         | 5642 (0.32)            | 408 (397-419)            | 72.1 (13.1)                   | 8426 (0.47)            | 582 (570-595)            | 1 780 031                       |
| <b>2010</b>  | 65.7 (13.7)                       | 2932 (0.16)            | 178 (172-185)            | 75.3 (11.5)                         | 6082 (0.34)            | 436 (425-447)            | 72.2 (13.0)                   | 9049 (0.50)            | 617 (604-630)            | 1 806 296                       |
| <b>2011</b>  | 65.4 (14.3)                       | 2932 (0.16)            | 176 (170-183)            | 74.9 (11.8)                         | 6001 (0.33)            | 423 (412-434)            | 71.8 (13.4)                   | 8967 (0.49)            | 602 (589-615)            | 1 835 254                       |
| <b>2012</b>  | 65.4 (14.2)                       | 3182 (0.17)            | 186 (179-193)            | 75.0 (11.4)                         | 6270 (0.34)            | 431 (420-442)            | 71.8 (13.2)                   | 9483 (0.51)            | 620 (607-633)            | 1 869 053                       |
| <b>2013</b>  | 64.9 (14.0)                       | 3142 (0.17)            | 179 (172-185)            | 74.9 (11.6)                         | 6215 (0.33)            | 421 (410-432)            | 71.6 (13.3)                   | 9385 (0.49)            | 602 (590-615)            | 1 901 493                       |
| <b>2014</b>  | 65.9 (14.4)                       | 3155 (0.16)            | 180 (173-186)            | 75.1 (11.5)                         | 6109 (0.32)            | 407 (396-417)            | 72.0 (13.3)                   | 9300 (0.48)            | 589 (577-601)            | 1 930 179                       |
| <b>Women</b> |                                   |                        |                          |                                     |                        |                          |                               |                        |                          |                                 |
| <b>2004</b>  | 74.6 (12.1)                       | 1702 (0.10)            | 85 (81-89)               | 80.6 (9.7)                          | 5188 (0.30)            | 240 (234-247)            | 79.2 (10.6)                   | 6957 (0.40)            | 327 (320-335)            | 1 751 033                       |
| <b>2005</b>  | 74.6 (12.2)                       | 1841 (0.10)            | 91 (87-95)               | 80.6 (9.9)                          | 5304 (0.30)            | 245 (238-251)            | 79.1 (10.9)                   | 7208 (0.41)            | 338 (331-346)            | 1 759 839                       |
| <b>2006</b>  | 75.7 (12.1)                       | 1886 (0.11)            | 92 (88-96)               | 80.8 (9.9)                          | 5387 (0.30)            | 246 (240-253)            | 79.6 (10.7)                   | 7344 (0.41)            | 341 (333-349)            | 1 771 271                       |
| <b>2007</b>  | 74.9 (12.4)                       | 1886 (0.11)            | 92 (88-96)               | 80.7 (10.1)                         | 5252 (0.29)            | 240 (234-247)            | 79.3 (11.1)                   | 7200 (0.40)            | 335 (327-342)            | 1 785 048                       |
| <b>2008</b>  | 74.4 (12.7)                       | 1930 (0.11)            | 94 (90-99)               | 80.5 (10.3)                         | 5242 (0.29)            | 239 (233-246)            | 79.0 (11.3)                   | 7235 (0.40)            | 336 (328-344)            | 1 806 143                       |
| <b>2009</b>  | 74.1 (13.0)                       | 2003 (0.11)            | 97 (93-102)              | 81.1 (10.0)                         | 4905 (0.27)            | 223 (216-229)            | 79.1 (11.4)                   | 6977 (0.38)            | 323 (315-330)            | 1 829 423                       |
| <b>2010</b>  | 74.9 (12.8)                       | 2033 (0.11)            | 97 (93-101)              | 80.7 (10.4)                         | 4927 (0.27)            | 223 (217-229)            | 79.1 (11.4)                   | 7014 (0.38)            | 322 (314-330)            | 1 853 360                       |
| <b>2011</b>  | 74.5 (12.9)                       | 2055 (0.11)            | 98 (94-102)              | 80.7 (10.4)                         | 4988 (0.27)            | 224 (218-231)            | 79.0 (11.5)                   | 7108 (0.38)            | 325 (317-332)            | 1 877 500                       |
| <b>2012</b>  | 74.5 (12.9)                       | 2260 (0.12)            | 106 (102-110)            | 80.5 (10.8)                         | 5050 (0.27)            | 227 (221-233)            | 78.7 (11.8)                   | 7365 (0.39)            | 335 (327-343)            | 1 902 496                       |
| <b>2013</b>  | 74.7 (12.6)                       | 2224 (0.12)            | 103 (99-108)             | 80.7 (10.6)                         | 4933 (0.26)            | 220 (214-226)            | 78.9 (11.6)                   | 7212 (0.37)            | 325 (318-333)            | 1 927 528                       |
| <b>2014</b>  | 74.7 (13.1)                       | 2357 (0.12)            | 108 (104-113)            | 80.6 (10.4)                         | 4860 (0.25)            | 216 (210-222)            | 78.8 (11.7)                   | 7270 (0.37)            | 326 (318-334)            | 1 951 772                       |

Kjerpeseth LJ, Igland J, Selmer R, et al. *Heart* 2020

| <b>Total</b> |             |             |               |             |               |               |             |               |               |           |
|--------------|-------------|-------------|---------------|-------------|---------------|---------------|-------------|---------------|---------------|-----------|
| <b>2004</b>  | 69.4 (13.8) | 3999 (0.12) | 117 (113-120) | 77.9 (10.7) | 10 745 (0.31) | 313 (308-319) | 75.7 (12.2) | 14 844 (0.43) | 433 (426-440) | 3 427 465 |
| <b>2005</b>  | 69.5 (14.0) | 4318 (0.13) | 125 (121-129) | 77.9 (10.8) | 11 312 (0.33) | 329 (323-335) | 75.6 (12.4) | 15 716 (0.46) | 456 (449-463) | 3 445 783 |
| <b>2006</b>  | 69.9 (14.1) | 4459 (0.13) | 128 (124-132) | 77.8 (11.0) | 11 460 (0.33) | 330 (324-336) | 75.7 (12.5) | 16 026 (0.46) | 462 (455-469) | 3 469 722 |
| <b>2007</b>  | 69.3 (14.2) | 4446 (0.13) | 126 (123-130) | 77.6 (11.1) | 11 335 (0.32) | 325 (320-331) | 75.4 (12.6) | 15 881 (0.45) | 455 (448-462) | 3 502 675 |
| <b>2008</b>  | 69.2 (14.3) | 4577 (0.13) | 129 (125-132) | 77.5 (11.4) | 11 286 (0.32) | 321 (315-327) | 75.2 (12.9) | 15 956 (0.45) | 453 (446-459) | 3 555 468 |
| <b>2009</b>  | 69.4 (14.0) | 4744 (0.13) | 132 (128-136) | 77.8 (11.3) | 10 547 (0.29) | 298 (293-304) | 75.3 (12.8) | 15 403 (0.43) | 433 (426-440) | 3 609 454 |
| <b>2010</b>  | 69.5 (14.0) | 4965 (0.14) | 136 (132-140) | 77.7 (11.3) | 11 009 (0.30) | 309 (303-315) | 75.2 (12.8) | 16 063 (0.44) | 447 (440-454) | 3 659 656 |
| <b>2011</b>  | 69.1 (14.5) | 4987 (0.13) | 135 (131-139) | 77.5 (11.5) | 10 989 (0.30) | 306 (300-311) | 75.0 (13.1) | 16 075 (0.43) | 443 (437-450) | 3 712 754 |
| <b>2012</b>  | 69.2 (14.4) | 5442 (0.14) | 145 (141-149) | 77.5 (11.4) | 11 320 (0.30) | 311 (305-317) | 74.8 (13.1) | 16 848 (0.45) | 458 (451-465) | 3 771 549 |
| <b>2013</b>  | 68.9 (14.3) | 5366 (0.14) | 140 (137-144) | 77.4 (11.5) | 11 148 (0.29) | 304 (298-309) | 74.7 (13.1) | 16 597 (0.43) | 446 (439-453) | 3 829 021 |
| <b>2014</b>  | 69.6 (14.5) | 5512 (0.14) | 142 (139-146) | 77.6 (11.3) | 10 969 (0.28) | 295 (290-301) | 75.0 (13.1) | 16 570 (0.43) | 440 (433-447) | 3 881 951 |

1: Incident cases with a primary AF diagnosis at inpatient admission.

2: Incident cases with a secondary AF diagnosis at inpatient admission.

3: Incident cases with a primary or secondary AF diagnosis at inpatient admission or out-of-hospital death from AF

4: Percent of population free of atrial fibrillation.

5: Age-standardized incidence rate (95% confidence interval) per 100 000 years
