# Supplementary material
Source: HighWire-hosted journal article supplement (https://heart.bmj.com/content/107/3/201)
Supplement: inline-supplementary-material-6 [file inline-supplementary-material-6.pdf]

Kjerpeseth LJ, Igland J, Selmer R, et al. *Heart* 2020**Supplementary Table 4.** Number of patients (%) with comorbidity reported at inpatient admission for incident atrial fibrillation (AF) by sex and age group.

|                                        | Men         |              |              |            |              | Women       |             |              |            |              |
|----------------------------------------|-------------|--------------|--------------|------------|--------------|-------------|-------------|--------------|------------|--------------|
|                                        | 18-44 years | 45-64 years  | 65-84 years  | ≥85 years  | All ages     | 18-44 years | 45-64 years | 65-84 years  | ≥85 years  | All ages     |
| <b>AF primary diagnosis, cases (%)</b> | 2389 (100)  | 11 209 (100) | 14 688 (100) | 2352 (100) | 30 638 (100) | 514 (100)   | 3862 (100)  | 12 552 (100) | 5249 (100) | 22 177 (100) |
| Cerebrovascular disease                | 7 (0)       | 110 (1)      | 386 (3)      | 106 (5)    | 609 (2)      | 1 (0)       | 35 (1)      | 326 (3)      | 193 (4)    | 555 (3)      |
| Stroke                                 | 1 (0)       | 47 (0)       | 153 (1)      | 37 (2)     | 238 (1)      | 1 (0)       | 14 (0)      | 131 (1)      | 81 (2)     | 227 (1)      |
| Coronary heart disease                 | 29 (1)      | 1078 (10)    | 2933 (20)    | 551 (23)   | 4591 (15)    | 11 (2)      | 204 (5)     | 1689 (13)    | 984 (19)   | 2888 (13)    |
| Myocardial infarction                  | 4 (0)       | 130 (1)      | 344 (2)      | 93 (4)     | 571 (2)      | 2 (0)       | 40 (1)      | 221 (2)      | 165 (3)    | 428 (2)      |
| Heart failure                          | 63 (3)      | 758 (7)      | 1823 (12)    | 552 (23)   | 3196 (10)    | 14 (3)      | 177 (5)     | 1386 (11)    | 1302 (25)  | 2879 (13)    |
| Valvular heart disease                 | 34 (1)      | 380 (3)      | 996 (7)      | 195 (8)    | 1605 (5)     | 18 (4)      | 146 (4)     | 991 (8)      | 498 (9)    | 1653 (7)     |
| Pacemaker, ICD                         | 12 (1)      | 69 (1)       | 210 (1)      | 620 (3)    | 353 (1)      | 2 (0)       | 17 (0)      | 108 (1)      | 97 (2)     | 224 (1)      |
| Hypertension                           | 128 (5)     | 2226 (20)    | 3904 (27)    | 570 (24)   | 6828 (22)    | 19 (4)      | 780 (20)    | 4230 (34)    | 1650 (31)  | 6679 (30)    |
| Peripheral vascular disease            | 12 (1)      | 106 (1)      | 325 (2)      | 64 (3)     | 507 (2)      | 2 (0)       | 33 (1)      | 188 (1)      | 78 (1)     | 301 (1)      |
| Dyslipidaemias                         | 43 (2)      | 324 (3)      | 365 (2)      | 15 (1)     | 747 (2)      | 0 (0)       | 126 (3)     | 430 (3)      | 53 (1)     | 609 (3)      |
| Diabetes mellitus                      | 35 (1)      | 621 (6)      | 1260 (9)     | 184 (8)    | 2100 (7)     | 4 (1)       | 212 (5)     | 1000 (8)     | 351 (7)    | 1567 (7)     |
| Renal disease                          | 15 (1)      | 123 (1)      | 521 (4)      | 209 (9)    | 868 (3)      | 4 (1)       | 41 (1)      | 271 (2)      | 250 (5)    | 566 (3)      |
| Chronic pulmonary disease              | 18 (1)      | 352 (3)      | 1145 (8)     | 191 (8)    | 1706 (6)     | 6 (1)       | 186 (5)     | 920 (7)      | 252 (5)    | 1364 (6)     |
| Pneumonia                              | 5 (0)       | 116 (1)      | 378 (3)      | 125 (5)    | 624 (2)      | 2 (0)       | 44 (1)      | 270 (2)      | 227 (4)    | 543 (2)      |
| Malignancy                             | 9 (0)       | 155 (1)      | 705 (5)      | 143 (6)    | 1012 (3)     | 2 (0)       | 85 (2)      | 363 (3)      | 100 (2)    | 550 (2)      |
| Dementia                               | 0 (0)       | 4 (0)        | 154 (1)      | 108 (5)    | 266 (1)      | 0 (0)       | 2 (0)       | 223 (2)      | 302 (6)    | 527 (2)      |
| Frailty                                | 2 (0)       | 10 (0)       | 113 (1)      | 67 (3)     | 192 (1)      | 1 (0)       | 8 (0)       | 122 (1)      | 149 (3)    | 280 (1)      |
| Bleeding and peptic ulcer              | 9 (0)       | 79 (1)       | 349 (2)      | 126 (5)    | 563 (2)      | 3 (1)       | 34 (1)      | 324 (3)      | 273 (5)    | 634 (3)      |
| Thromboembolism                        | 5 (0)       | 43 (0)       | 124 (1)      | 29 (1)     | 201 (1)      | 2 (0)       | 29 (1)      | 124 (1)      | 65 (1)     | 220 (1)      |
| Hypo- or hyperthyreosis                | 13 (1)      | 123 (1)      | 199 (1)      | 47 (2)     | 382 (1)      | 17 (3)      | 231 (6)     | 759 (6)      | 299 (6)    | 1306 (6)     |
| Autoimmune disease                     | 13 (1)      | 107 (1)      | 188 (1)      | 36 (2)     | 344 (1)      | 4 (1)       | 75 (2)      | 331 (3)      | 117 (2)    | 527 (2)      |
| Alcohol misuse and liver disease       | 6 (0)       | 92 (1)       | 49 (0)       | 3 (0)      | 150 (0)      | 4 (1)       | 20 (1)      | 25 (0)       | 10 (0)     | 59 (0)       |
| Any of the above                       | 368 (15)    | 4516 (40)    | 8972 (61)    | 1742 (74)  | 15 598 (51)  | 93 (18)     | 1616 (42)   | 8038 (64)    | 3963 (76)  | 13 710 (62)  |
| <b>Charlson Comorbidity Index</b>      |             |              |              |            |              |             |             |              |            |              |
| Score = 0, n (%)                       | 2229 (93)   | 8941 (80)    | 9002 (61)    | 1079 (46)  | 21 251 (69)  | 479 (93)    | 3127 (81)   | 8214 (65)    | 2666 (51)  | 14 486 (65)  |
| Score = 1, n (%)                       | 122 (5)     | 1590 (14)    | 3305 (22)    | 659 (28)   | 5676 (19)    | 25 (5)      | 487 (13)    | 2833 (23)    | 1743 (33)  | 5088 (23)    |
| Score ≥ 2, n (%)                       | 39 (2)      | 677 (6)      | 2383 (16)    | 612 (26)   | 3711 (12)    | 10 (2)      | 248 (6)     | 1508 (12)    | 837 (16)   | 2603 (12)    |
| Score, mean (SD)                       | 0.1 (0.5)   | 0.3 (0.9)    | 0.8 (1.4)    | 1.1 (1.6)  | 0.6 (1.2)    | 0.1 (0.4)   | 0.3 (1.1)   | 0.6 (1.2)    | 0.8 (1.1)  | 0.6 (1.1)    |

Kjerpeseth LJ, Igland J, Selmer R, et al. *Heart* 2020

|                                          |           |              |              |              |              |           |            |              |              |              |
|------------------------------------------|-----------|--------------|--------------|--------------|--------------|-----------|------------|--------------|--------------|--------------|
| <b>AF secondary diagnosis, cases (%)</b> | 868 (100) | 10 507 (100) | 40 515 (100) | 14 194 (100) | 66 084 (100) | 332 (100) | 3743 (100) | 29 149 (100) | 22 812 (100) | 56 036 (100) |
| Cerebrovascular disease                  | 34 (4)    | 851 (8)      | 5168 (13)    | 2058 (14)    | 8111 (12)    | 12 (4)    | 306 (8)    | 3956 (14)    | 3557 (16)    | 7831 (14)    |
| Stroke                                   | 24 (3)    | 675 (6)      | 3697 (9)     | 1455 (10)    | 5851 (9)     | 9 (3)     | 246 (7)    | 3015 (10)    | 2763 (12)    | 6033 (11)    |
| Coronary heart disease                   | 102 (12)  | 3825 (36)    | 14 639 (36)  | 4269 (30)    | 22 835 (35)  | 20 (6)    | 726 (19)   | 7621 (26)    | 5833 (26)    | 14 200 (25)  |
| Myocardial infarction                    | 53 (6)    | 1501 (14)    | 5291 (13)    | 1900 (13)    | 8745 (13)    | 10 (3)    | 317 (8)    | 3236 (11)    | 2923 (13)    | 6486 (12)    |
| Heart failure                            | 190 (22)  | 2179 (21)    | 9130 (23)    | 4287 (30)    | 15 786 (24)  | 52 (16)   | 574 (15)   | 6277 (22)    | 7240 (32)    | 14 143 (25)  |
| Valvular heart disease                   | 78 (9)    | 1121 (11)    | 4255 (11)    | 1194 (8)     | 6648 (10)    | 33 (10)   | 414 (11)   | 3570 (12)    | 2536 (11)    | 6553 (12)    |
| Pacemaker, ICD                           | 10 (1)    | 147 (1)      | 605 (1)      | 254 (2)      | 1016 (2)     | 10 (3)    | 41 (1)     | 325 (1)      | 333 (1)      | 709 (1)      |
| Hypertension                             | 83 (10)   | 2878 (27)    | 11 984 (30)  | 3244 (23)    | 18 189 (28)  | 31 (9)    | 900 (24)   | 9812 (34)    | 6811 (30)    | 17 554 (31)  |
| Peripheral vascular disease              | 32 (4)    | 595 (6)      | 2762 (7)     | 647 (5)      | 4036 (6)     | 7 (2)     | 135 (4)    | 1291 (4)     | 681 (3)      | 2114 (4)     |
| Dyslipidaemias                           | 22 (3)    | 585 (6)      | 1441 (4)     | 130 (1)      | 2178 (3)     | 2 (1)     | 181 (5)    | 1054 (4)     | 218 (1)      | 1455 (3)     |
| Diabetes mellitus                        | 47 (5)    | 1442 (14)    | 5900 (15)    | 1500 (11)    | 8889 (13)    | 14 (4)    | 453 (12)   | 3773 (13)    | 2255 (10)    | 6495 (12)    |
| Renal disease                            | 32 (4)    | 430 (4)      | 2973 (7)     | 1830 (13)    | 5265 (8)     | 7 (2)     | 145 (4)    | 1387 (5)     | 1585 (7)     | 3124 (6)     |
| Chronic pulmonary disease                | 35 (4)    | 921 (9)      | 6143 (15)    | 1555 (11)    | 8654 (13)    | 21 (6)    | 558 (15)   | 4423 (15)    | 1727 (8)     | 6729 (12)    |
| Pneumonia                                | 83 (10)   | 1422 (14)    | 6832 (17)    | 3187 (22)    | 11 524 (17)  | 27 (8)    | 548 (15)   | 4411 (15)    | 4237 (19)    | 9223 (16)    |
| Malignancy                               | 29 (3)    | 919 (9)      | 5568 (14)    | 1696 (12)    | 8212 (12)    | 18 (5)    | 483 (13)   | 2820 (10)    | 1207 (5)     | 4528 (8)     |
| Dementia                                 | 0 (0)     | 23 (0)       | 1178 (3)     | 1156 (8)     | 2357 (4)     | 0 (0)     | 11 (0)     | 1136 (4)     | 2239 (10)    | 3386 (6)     |
| Frailty                                  | 25 (3)    | 269 (3)      | 1581 (4)     | 898 (6)      | 2773 (4)     | 7 (2)     | 95 (3)     | 1340 (5)     | 1668 (7)     | 3110 (6)     |
| Bleeding and peptic ulcer                | 43 (5)    | 690 (7)      | 3904 (10)    | 1860 (13)    | 6497 (10)    | 23 (7)    | 288 (8)    | 2831 (10)    | 2771 (12)    | 5913 (11)    |
| Thromboembolism                          | 31 (4)    | 422 (4)      | 1402 (3)     | 414 (3)      | 2269 (3)     | 17 (5)    | 169 (5)    | 1169 (4)     | 796 (3)      | 2151 (4)     |
| Hypo- or hyperthyreosis                  | 16 (2)    | 145 (1)      | 640 (2)      | 274 (2)      | 1075 (2)     | 19 (6)    | 278 (7)    | 1777 (6)     | 1178 (5)     | 3252 (6)     |
| Autoimmune disease                       | 29 (3)    | 227 (2)      | 970 (2)      | 255 (2)      | 1481 (2)     | 9 (3)     | 175 (5)    | 1272 (4)     | 587 (3)      | 2043 (4)     |
| Alcohol misuse and liver disease         | 32 (4)    | 267 (3)      | 329 (1)      | 47 (0)       | 675 (1)      | 0 (0)     | 78 (2)     | 177 (1)      | 53 (0)       | 308 (1)      |
| Any of the above                         | 537 (62)  | 9071 (86)    | 36 648 (90)  | 12 877 (91)  | 59 133 (89)  | 184 (55)  | 3096 (83)  | 25 902 (89)  | 20 544 (90)  | 49 726 (89)  |
| <b>Charlson Comorbidity Index</b>        |           |              |              |              |              |           |            |              |              |              |
| Score = 0, n (%)                         | 487 (56)  | 3714 (35)    | 10 694 (26)  | 3294 (23)    | 18 189 (28)  | 208 (63)  | 1445 (39)  | 9101 (31)    | 6241 (27)    | 16 995 (30)  |
| Score = 1, n (%)                         | 253 (29)  | 3621 (34)    | 12 711 (31)  | 4575 (32)    | 21 160 (32)  | 79 (24)   | 1160 (31)  | 9789 (34)    | 8740 (38)    | 19 768 (35)  |
| Score ≥ 2, n (%)                         | 129 (15)  | 3181 (30)    | 17 114 (42)  | 6308 (44)    | 26 732 (40)  | 45 (14)   | 1142 (30)  | 10 271 (35)  | 7814 (34)    | 19 272 (34)  |
| Score, mean (SD)                         | 0.8 (1.3) | 1.4 (1.8)    | 1.8 (2.1)    | 1.8 (1.9)    | 1.7 (2.0)    | 0.7 (1.4) | 1.5 (2.2)  | 1.5 (1.8)    | 1.4 (1.5)    | 1.5 (1.7)    |

ICD is implantable cardioverter-defibrillator. See Supplementary Table 1 for definitions.
